# Supplementary material
Source: ML conference proceedings conference paper supplement (https://proceedings.mlr.press/v139/mita21a.html)
Supplement: Supplementary file [file mita21a-supp.pdf]

---

**Supplementary material for ICML 2021**  
**An Identifiable Double VAE For Disentangled Representations**

---

**A. ELBO derivation for IDVAE**

$$\begin{aligned}
\log p(\mathbf{x}, \mathbf{u}) &= \log \int p(\mathbf{x}, \mathbf{u}, \mathbf{z}) d\mathbf{z} = \\
&= \log \int p(\mathbf{x}|\mathbf{u}, \mathbf{z}) p(\mathbf{z}|\mathbf{u}) p(\mathbf{u}) d\mathbf{z} = \\
&= \log \int \frac{p(\mathbf{x}|\mathbf{u}, \mathbf{z}) p(\mathbf{z}|\mathbf{u}) p(\mathbf{u})}{q(\mathbf{z}|\mathbf{x}, \mathbf{u})} q(\mathbf{z}|\mathbf{x}, \mathbf{u}) d\mathbf{z} \geq \mathcal{L}_{\text{IDVAE}} \\
&= \mathbb{E}_{q(\mathbf{z}|\mathbf{x}, \mathbf{u})} \left[ \log \frac{p(\mathbf{x}|\mathbf{u}, \mathbf{z}) p(\mathbf{z}|\mathbf{u}) p(\mathbf{u})}{q(\mathbf{z}|\mathbf{x}, \mathbf{u})} \right] = \\
&= \mathbb{E}_{q(\mathbf{z}|\mathbf{x}, \mathbf{u})} [\log p(\mathbf{x}|\mathbf{u}, \mathbf{z})] - KL(q(\mathbf{z}|\mathbf{x}, \mathbf{u}) || p(\mathbf{z}|\mathbf{u})) + \log p(\mathbf{u}), \tag{1}
\end{aligned}$$

where:

$$\begin{aligned}
\log p(\mathbf{u}) &= \log \int p(\mathbf{u}, \mathbf{z}) d\mathbf{z} \geq \mathcal{L}_{\text{prior}} = \\
&= \mathbb{E}_{q(\mathbf{z}|\mathbf{u})} [\log p(\mathbf{u}|\mathbf{z})] - KL(q(\mathbf{z}|\mathbf{u}) || p(\mathbf{z})). \tag{2}
\end{aligned}$$

**B. ELBO derivation for SS-IDVAE**

$$\begin{aligned}
\log p(\mathbf{x}) &= \log \int p(\mathbf{x}, \mathbf{u}, \mathbf{z}) d\mathbf{u} d\mathbf{z} = \\
&= \log \int p(\mathbf{x}|\mathbf{u}, \mathbf{z}) p(\mathbf{z}|\mathbf{u}) p(\mathbf{u}) d\mathbf{u} d\mathbf{z} = \\
&= \log \int \frac{p(\mathbf{x}|\mathbf{u}, \mathbf{z}) p(\mathbf{z}|\mathbf{u}) p(\mathbf{u})}{q(\mathbf{u}, \mathbf{z}|\mathbf{x})} q(\mathbf{u}, \mathbf{z}|\mathbf{x}) d\mathbf{u} d\mathbf{z} \geq \\
&\geq \mathbb{E}_{q(\mathbf{u}, \mathbf{z}|\mathbf{x})} \left[ \log \frac{p(\mathbf{x}|\mathbf{u}, \mathbf{z}) p(\mathbf{z}|\mathbf{u}) p(\mathbf{u})}{q(\mathbf{u}, \mathbf{z}|\mathbf{x})} \right] = \\
&= \mathbb{E}_{q(\mathbf{z}|\mathbf{x}, \mathbf{u}) q(\mathbf{u}|\mathbf{x})} \left[ \log \frac{p(\mathbf{x}|\mathbf{u}, \mathbf{z}) p(\mathbf{z}|\mathbf{u}) p(\mathbf{u})}{q(\mathbf{z}|\mathbf{x}, \mathbf{u}) q(\mathbf{u}|\mathbf{x})} \right] = \\
&= \mathbb{E}_{q(\mathbf{u}|\mathbf{x})} [\mathcal{L}_{\text{IDVAE}}] + \mathcal{H}(q(\mathbf{u}|\mathbf{x})). \tag{3}
\end{aligned}$$

Combining eqs. (1) to (3) we obtain  $\mathcal{L}_{\text{SS-IDVAE}}$ , where it is clear that we use the sum over the data samples instead of the expectation. As stated in the main paper, we also add the term  $-\mathbb{E}_{(\mathbf{x}, \mathbf{u}) \sim p_l} [\log q(\mathbf{u}|\mathbf{x})]$  – such that it can learn also from labeled data.

**C. Sketch of the proof of Theorem 1**

In this section, we report a sketch of the proof of Theorem 1. Following the proof strategy of Khemakhem et al. (2020), the proof consists of three main steps.

In the first step, we use assumption (i) to demonstrate that observed data distributions are equal to noiseless distributions. Supposing to have two sets of parameters  $(\mathbf{f}, \mathbf{T}, \boldsymbol{\eta})$  and  $(\tilde{\mathbf{f}}, \tilde{\mathbf{T}}, \tilde{\boldsymbol{\eta}})$ , with a change of variable  $\bar{\mathbf{x}} = \mathbf{f}(\mathbf{z}) = \tilde{\mathbf{f}}(\mathbf{z})$ , we show that:

$$\tilde{p}_{\tilde{\mathbf{T}}, \tilde{\boldsymbol{\eta}}, \tilde{\mathbf{f}}, \tilde{\mathbf{u}}}(\mathbf{x}) = \tilde{p}_{\mathbf{T}, \boldsymbol{\eta}, \mathbf{f}, \mathbf{u}}(\mathbf{x}), \quad (4)$$

where:

$$\tilde{p}_{\tilde{\mathbf{T}}, \tilde{\boldsymbol{\eta}}, \tilde{\mathbf{f}}, \tilde{\mathbf{u}}}(\mathbf{x}) = p_{\mathbf{T}, \boldsymbol{\eta}, \mathbf{f}, \mathbf{u}}(\mathbf{f}^{-1}(\mathbf{x})|\mathbf{u})|det J_{\mathbf{f}^{-1}}(\mathbf{x})|\mathbb{1}_{\mathcal{X}}(\mathbf{x}) \quad (5)$$

In the second step, we use assumption (iv) to remove all the terms that are a function of  $\mathbf{x}$  or  $\mathbf{u}$ . By substituting  $p_{\mathbf{T}, \boldsymbol{\eta}}$  with its exponential conditionally factorial form, taking the log of both sides of eq. (5), we obtain  $dk + 1$  equations. Then:

$$\mathbf{T}(\mathbf{f}^{-1}(\mathbf{x})) = \mathbf{A}\mathbf{T}'(\mathbf{f}'^{-1}(\mathbf{x})) + \mathbf{c}. \quad (6)$$

In the last step, assumptions (i) and (iii) are used to show that the linear transformation is invertible and so  $(\mathbf{f}, \mathbf{T}, \boldsymbol{\eta}) \sim (\tilde{\mathbf{f}}, \tilde{\mathbf{T}}, \tilde{\boldsymbol{\eta}})$ . This concludes the proof.

For a full derivation of the proof, we point the reader to section B of the supplement in Khemakhem et al. (2020), which holds also for our variant of the theorem.

## D. Model architectures, parameters and hyperparameters

All the selected methods (including the semi-supervised variants) share the same convolutional architecture. The conditional prior in IVAE is a MLP network, in IDVAE we use a simple MLP VAE, both with leaky ReLU activation functions. The ground-truth factor learner implementing  $q_{\zeta}(\mathbf{u}|\mathbf{x})$  in SS-IDVAE and SS-IVAE is a convolutional neural network.

| Encoder                                         | Decoder                                                                 |
|-------------------------------------------------|-------------------------------------------------------------------------|
| Input: $64 \times 64 \times$ number of channels | Input: $\mathbb{R}^d$ , where $d$ is the number of ground-truth factors |
| $4 \times 4$ conv, 32 ReLU, stride 2            | FC, 256 ReLU                                                            |
| $4 \times 4$ conv, 32 ReLU, stride 2            | FC, $4 \times 4 \times 64$ ReLU                                         |
| $4 \times 4$ conv, 64 ReLU, stride 2            | $4 \times 4$ upconv, 64 ReLU, stride 2                                  |
| $4 \times 4$ conv, 64 ReLU, stride 2            | $4 \times 4$ upconv, 32 ReLU, stride 2                                  |
| FC 256*, FC $2 \times d$                        | $4 \times 4$ upconv, 32 ReLU, stride 2                                  |
|                                                 | $4 \times 4$ upconv, number of channels, stride 2                       |

Table 1. Main Encoder-Decoder architecture. In IVAE and IDVAE, we give  $\mathbf{u}$  as input to the fully connected layer of the Encoder which size becomes  $256 + d$ .

| Conditional Prior Encoder | Conditional Prior Decoder |
|---------------------------|---------------------------|
| FC, 1000 leaky ReLU       | FC, 1000 leaky ReLU       |
| FC, 1000 leaky ReLU       | FC, 1000 leaky ReLU       |
| FC, 1000 leaky ReLU       | FC, 1000 leaky ReLU       |
| FC $2 \times d$           | FC $d$                    |

Table 2. IDVAE Conditional Prior Encoder-Decoder architecture. IVAE uses the encoder only.

**Ground-truth Factor Learner**

Input:  $64 \times 64 \times$  number of channels.  $d$  is the number of ground-truth factors.  
 $4 \times 4$  conv, 32 ReLU, stride 2  
 $4 \times 4$  conv, 32 ReLU, stride 2  
 $4 \times 4$  conv, 64 ReLU, stride 2  
 $4 \times 4$  conv, 64 ReLU, stride 2  
 FC 256, FC  $2 \times d$

Table 3. Ground-truth factor learner implementing  $q_{\zeta}(\mathbf{u}|\mathbf{x})$  in SS-IDVAE and SS-IVAE.

| Parameters          | Values  |
|---------------------|---------|
| batch_size          | 64      |
| optimizer           | Adam    |
| Adam: beta1         | 0.9     |
| Adam: beta2         | 0.999   |
| Adam: epsilon       | 1e-8    |
| Adam: learning_rate | 1e-4    |
| training_steps      | 300*000 |

Table 4. Common hyperparameters to each of the considered methods.

**E. Implementation of disentanglement metrics**

**Beta score** The idea behind the beta score (Higgins et al., 2017) is to fix a random ground-truth factor and sample two mini batches of observations from the corresponding generative model. The encoder is then used to obtain a learned representation from the observations (with a ground-truth factor in common). The dimension-wise absolute difference between the two representation is computed and a simple linear classifier  $C$  is used to predict the corresponding ground-truth factor. This is repeated  $batch\_size$  times and the accuracy of the predictor is the disentanglement metric score.

**MIG - Mutual Information Gap** The mutual information gap (MIG) (Chen et al., 2018) is computed as the average, normalized difference between the highest and second highest mutual information of each ground-truth factor with the dimensions of the learned representation. As done in Locatello et al. (2019), we consider the mean representation. and compute the discrete mutual information by binning each dimension of the mean learned representation into  $n\_bins$  bins.

**Modularity and Explicitness** A representation is modular if each dimension depends on at most one ground-truth factor. Ridgeway and Mozer (2018) propose to measure the Modularity as the average normalized squared difference of the mutual information of the factor of variations with the highest and second-highest mutual information with a dimension of the learned representation. A representation is explicit if it is easy to predict a factor of variation. To compute the explicitness, they train a one-versus-rest logistic regression classifier to predict the ground-truth factor of variation and measure its ROC-AUC. In the current implementation, observations are discretized into  $n\_bins$  bins.

**SAP - Separated Attribute Predictability** According to Kumar et al. (2018), the Separated Attribute Predictability (SAP) score is computed from a score matrix where each entry is the linear regression or classification score (in case of discrete factors) of predicting a given ground-truth factors with a given dimension of the learned representation. The (SAP) score is the average difference of the prediction error of the two most predictive learned dimensions for each factor. As done in (Locatello et al., 2019), we use a linear SVM as classifier.

As explained in the main paper, the implementation of the selected disentanglement evaluation metrics is based on Locatello et al. (2019). We report the main parameters in table 5.

| Disentanglement metrics     | Parameters                                                                       |
|-----------------------------|----------------------------------------------------------------------------------|
| Beta score                  | train_size=10'000, test_size=5'000, batch_size=64, predictor=logistic_regression |
| MIG                         | train_size=10'000, n_bins=20                                                     |
| Modularity and Explicitness | train_size=10'000, test_size=5'000, batch_size=16, n_bins=20                     |
| SAP score                   | train_size=10'000, test_size=5'000, batch_size=16, predictor=linearSVM, C=0.01   |

Table 5. Disentanglement metrics and their parameters.

165  
166  
167  
168  
169  
170  
171  
172  
173  
174  
175  
176  
177  
178  
179  
180  
181  
182  
183  
184  
185  
186  
187  
188  
189  
190  
191  
192  
193  
194  
195  
196  
197  
198  
199  
200  
201  
202  
203  
204  
205  
206  
207  
208  
209  
210  
211  
212  
213  
214  
215  
216  
217  
218  
219

**F. Full experiments**

In this section, we report the full set of experiments, including reconstructions and latent traversals.

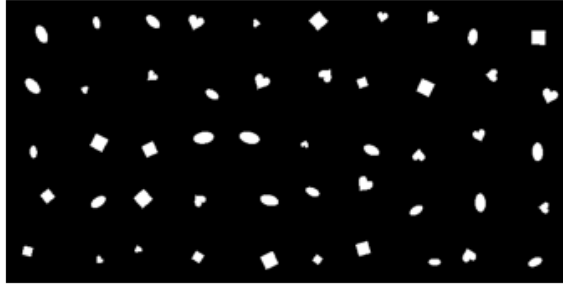

(a) DSPRITES: original observations.

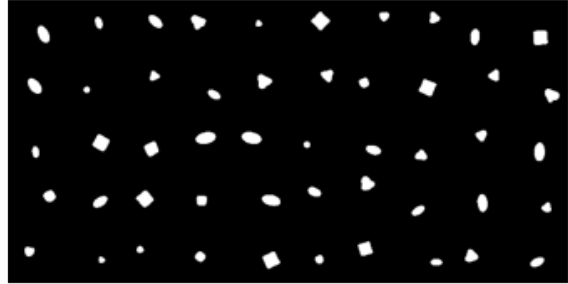

(b) DSPRITES: reconstructions by IDVAE.

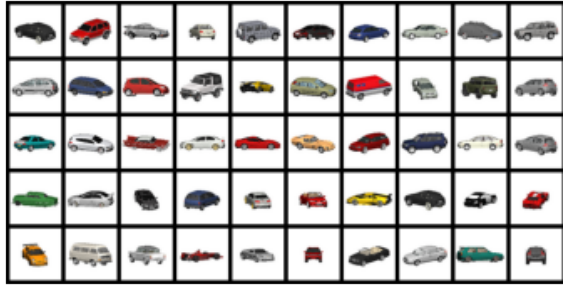

(c) CARS3D: original observations.

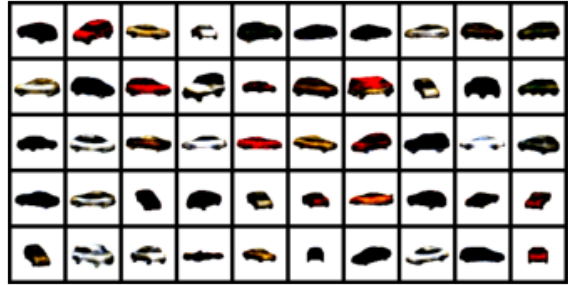

(d) CARS3D: reconstructions by IDVAE.

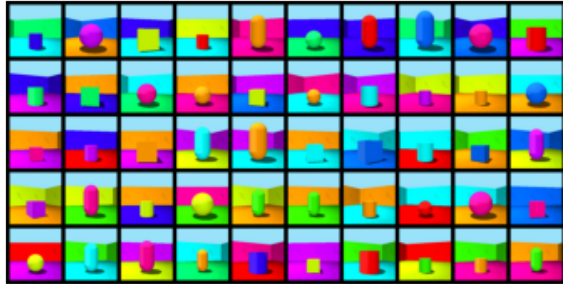

(e) SHAPES3D: original observations.

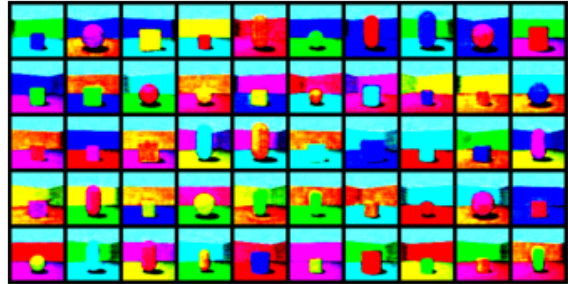

(f) SHAPES3D: reconstructions by IDVAE.

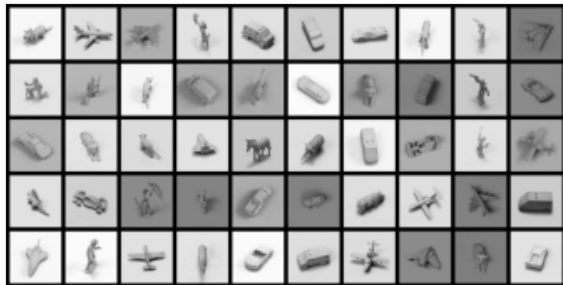

(g) SMALLNORB: original observations.

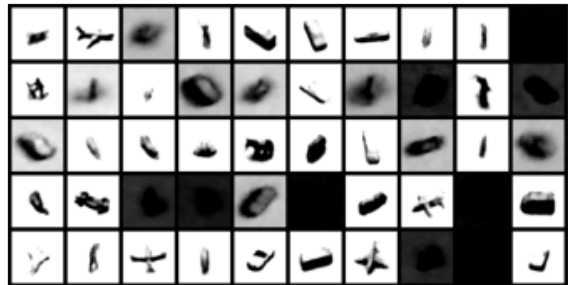

(h) SMALLNORB: reconstructions by IDVAE.

Figure 1. Original observations vs IDVAE reconstructions.

275  
276  
277  
278  
279  
280  
281  
282  
283  
284  
285  
286  
287  
288  
289  
290  
291  
292  
293  
294  
295  
296  
297  
298  
299  
300  
301  
302  
303  
304  
305  
306  
307  
308  
309  
310  
311  
312  
313  
314  
315  
316  
317  
318  
319  
320  
321  
322  
323  
324  
325  
326  
327  
328  
329

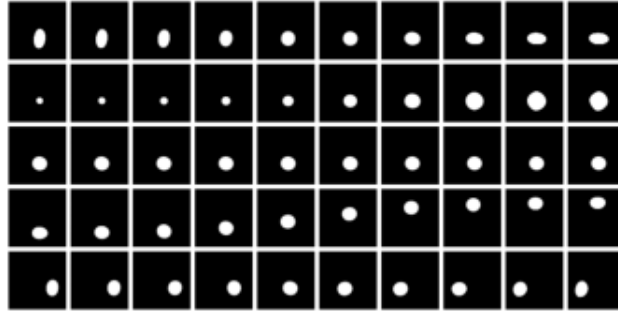

(a) DSPRITES.

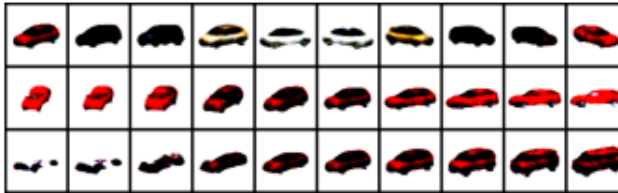

(b) CARS3D.

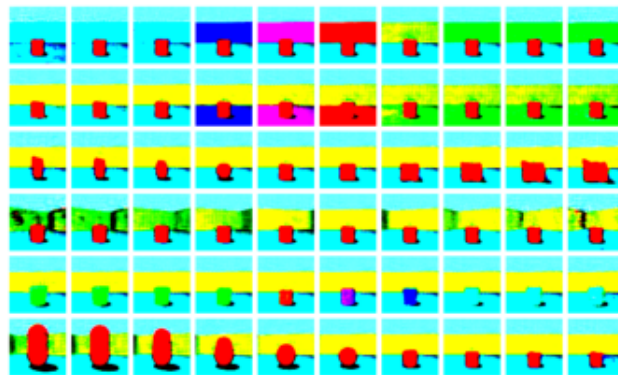

(c) SHAPES3D.

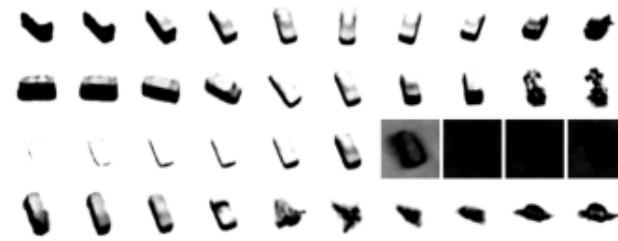

(d) SMALLNORB.

Figure 2. IDVAE latent traversals. Each row corresponds to a dimension of  $\mathbf{z}$ , that we vary in the range  $[-3, 3]$ . We can see that, in some cases, changing a dimension can affect multiple ground-truth factors, meaning that IDVAE has not obtained full disentanglement. (a) From top to bottom: orientation, scale, shape(?), posY, posX. (b) From top to bottom: azimuth, elevation, object type. (c) From top to bottom: wall color, floor color, object type, azimuth, object color, object size. (d) azimuth, elevation, lighting, category.

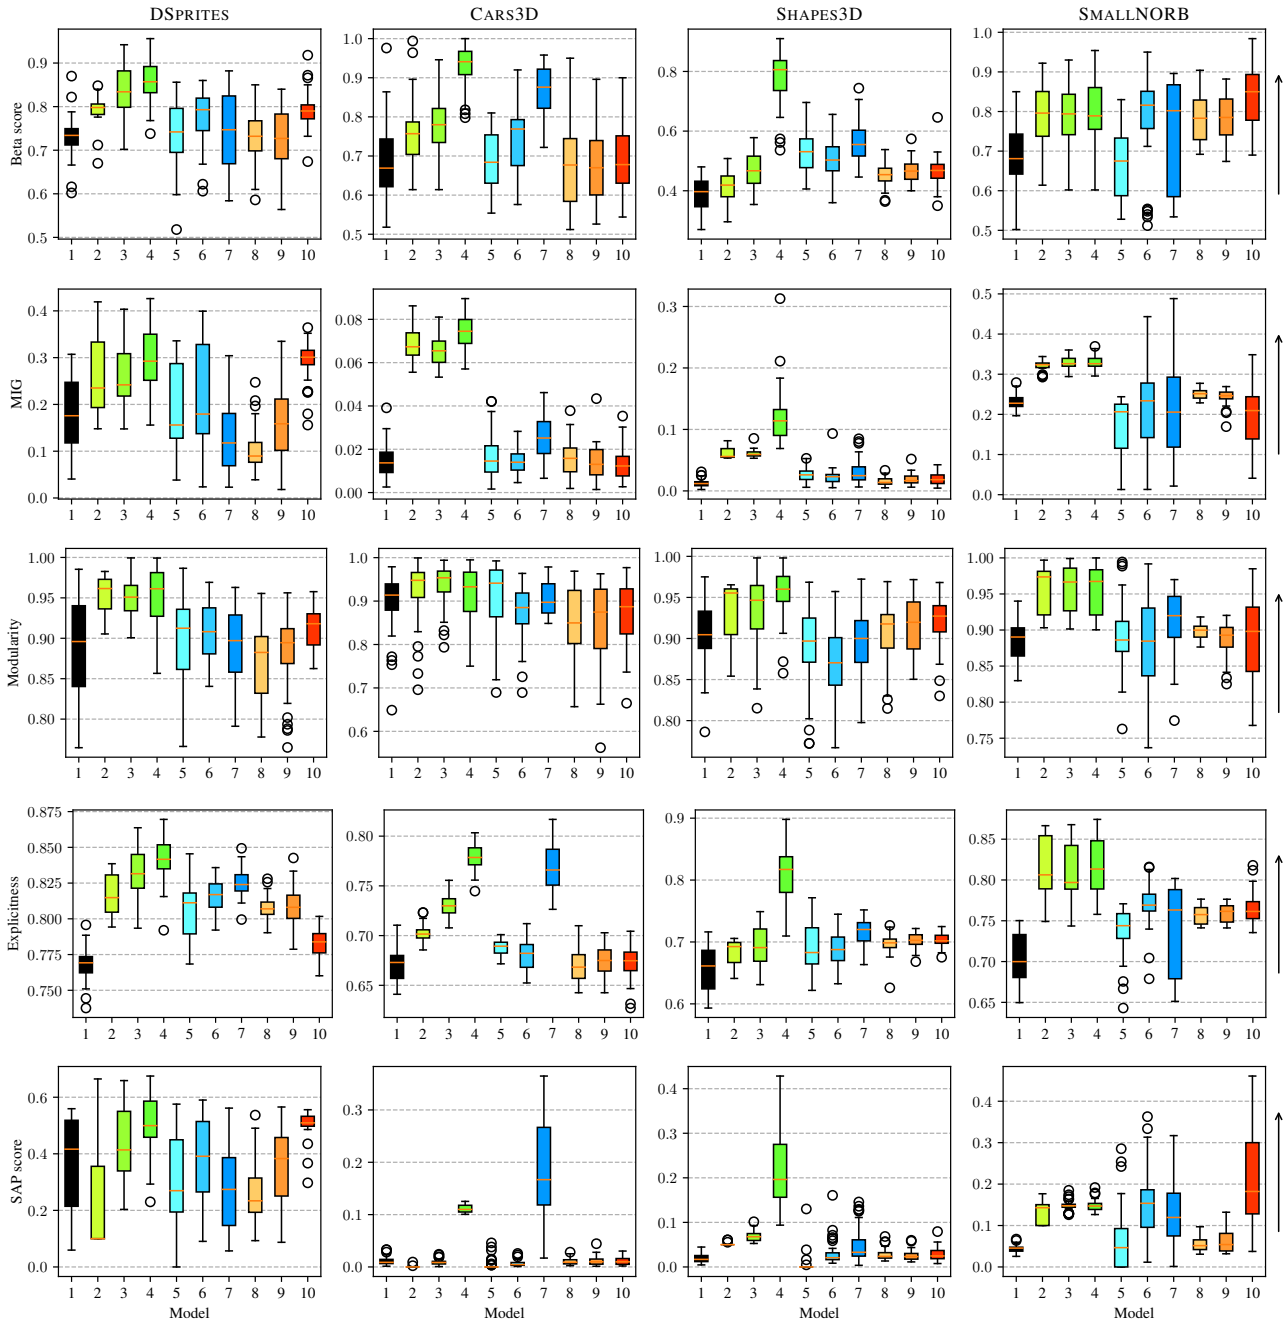

Figure 3. Beta score, MIG, Modularity, Explicitness, and SAP (the higher the better). 1= $\beta$ -VAE, 2=SS-IDVAE (1%), 3=SS-IDVAE (10%), 4=IDVAE, 5=SS-IVAE (1%), 6=SS-IVAE (10%), 7=IVAE, 8=SS-FULLVAE (1%), 9=SS-FULLVAE (10%), 10=FULLVAE. Percentage of labeled samples in parenthesis.

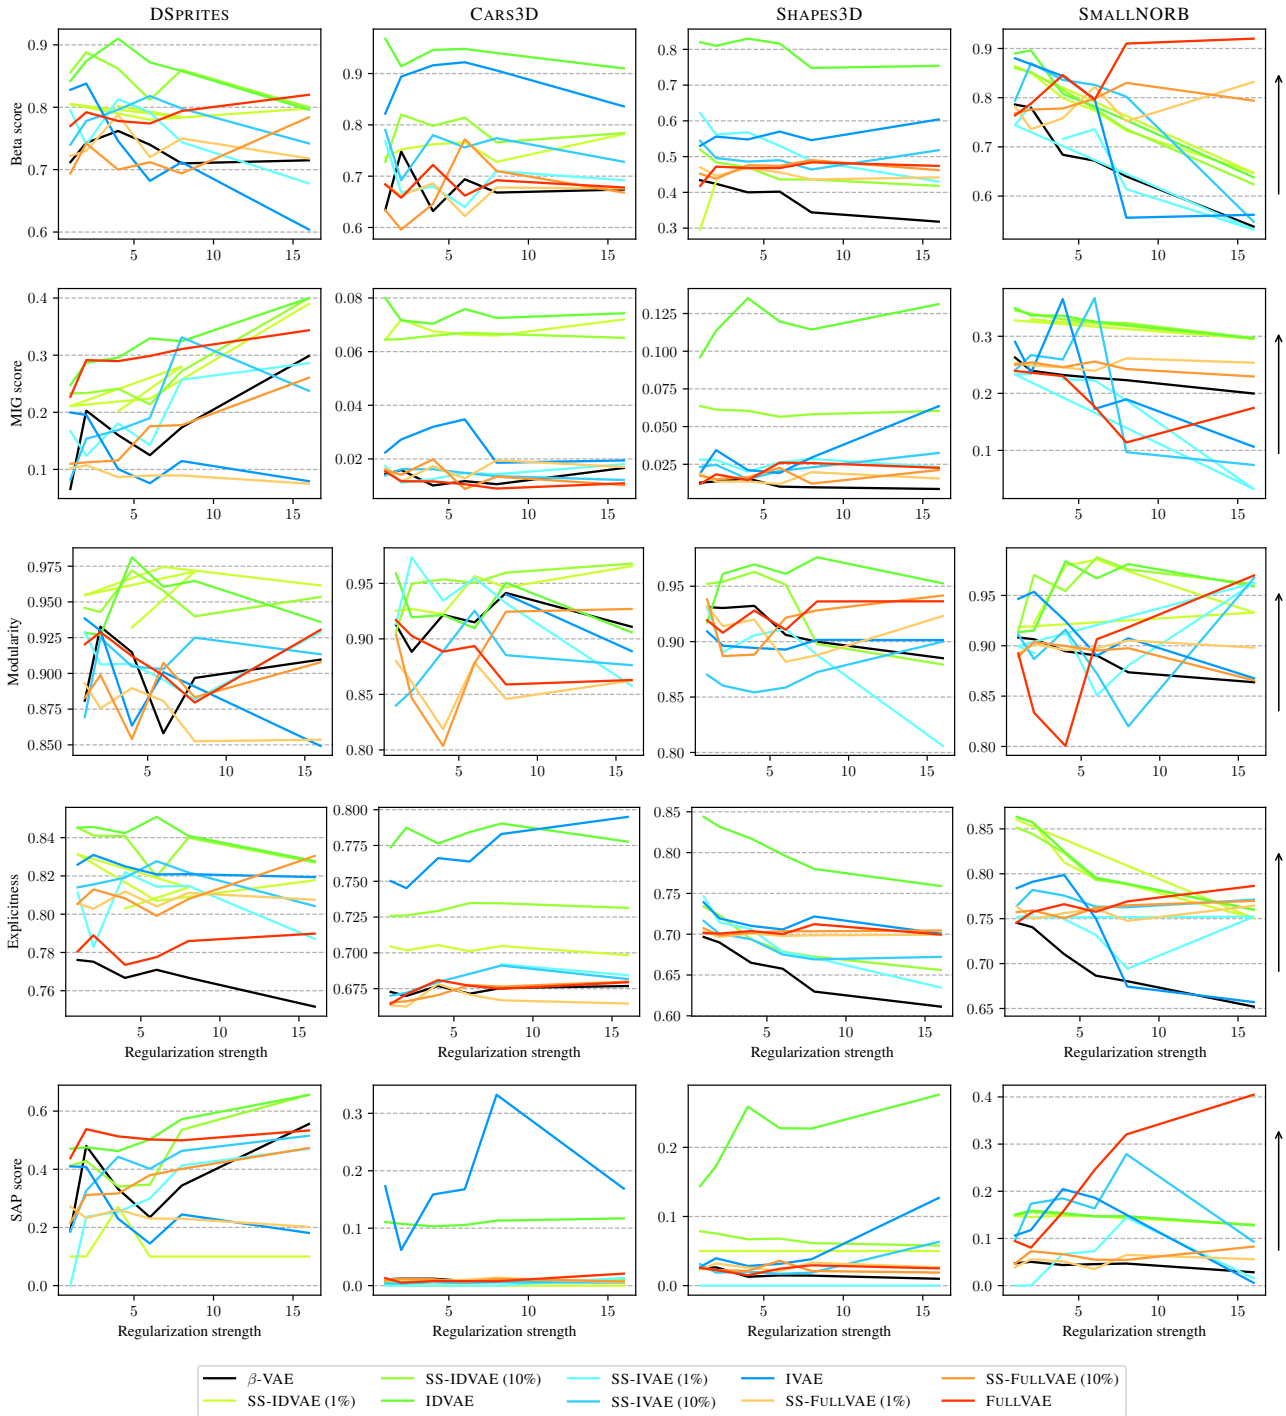

Figure 4. Beta score, MIG, modularity, explicitness and SAP median (the higher the better) as a function of the regularization strength, for each method on Dsprites, CARS3D, SHAPES3D, SMALLNORB.



|                  |        | DSprites | CARS3D | SHAPES3D | SMALLNORB |
|------------------|--------|----------|--------|----------|-----------|
| $\beta$ -VAE     | median | 0.73     | 0.67   | 0.40     | 0.68      |
|                  | mean   | 0.73     | 0.68   | 0.39     | 0.69      |
|                  | stdev  | 0.06     | 0.10   | 0.06     | 0.09      |
| SS-IDVAE (1%)    | median | 0.80     | 0.76   | 0.42     | 0.80      |
|                  | mean   | 0.79     | 0.76   | 0.41     | 0.79      |
|                  | stdev  | 0.04     | 0.08   | 0.08     | 0.08      |
| SS-IDVAE (10%)   | median | 0.83     | 0.78   | 0.47     | 0.79      |
|                  | mean   | 0.84     | 0.78   | 0.47     | 0.78      |
|                  | stdev  | 0.06     | 0.07   | 0.06     | 0.09      |
| IDVAE            | median | 0.86     | 0.94   | 0.81     | 0.79      |
|                  | mean   | 0.86     | 0.93   | 0.78     | 0.79      |
|                  | stdev  | 0.05     | 0.06   | 0.09     | 0.09      |
| SS-IVAE (1%)     | median | 0.74     | 0.68   | 0.53     | 0.68      |
|                  | mean   | 0.74     | 0.69   | 0.53     | 0.66      |
|                  | stdev  | 0.07     | 0.07   | 0.07     | 0.09      |
| SS-IVAE (10%)    | median | 0.79     | 0.77   | 0.50     | 0.82      |
|                  | mean   | 0.78     | 0.74   | 0.51     | 0.78      |
|                  | stdev  | 0.06     | 0.08   | 0.07     | 0.11      |
| IVAE             | median | 0.75     | 0.88   | 0.56     | 0.8       |
|                  | mean   | 0.74     | 0.87   | 0.56     | 0.74      |
|                  | stdev  | 0.09     | 0.06   | 0.07     | 0.14      |
| SS-FULLVAE (1%)  | median | 0.73     | 0.68   | 0.46     | 0.78      |
|                  | mean   | 0.73     | 0.67   | 0.46     | 0.78      |
|                  | stdev  | 0.06     | 0.12   | 0.05     | 0.05      |
| SS-FULLVAE (10%) | median | 0.72     | 0.67   | 0.47     | 0.79      |
|                  | mean   | 0.73     | 0.67   | 0.47     | 0.79      |
|                  | stdev  | 0.07     | 0.10   | 0.04     | 0.05      |
| FULLVAE          | median | 0.79     | 0.68   | 0.47     | 0.85      |
|                  | mean   | 0.79     | 0.70   | 0.47     | 0.84      |
|                  | stdev  | 0.04     | 0.09   | 0.05     | 0.07      |

Table 6. Beta score median, mean and standard deviation (stdev) for all the tested methods and datasets (the higher the better).

|                  |        | DSprites | CARS3D | SHAPES3D | SMALLNORB |
|------------------|--------|----------|--------|----------|-----------|
| $\beta$ -VAE     | median | 0.18     | 0.01   | 0.01     | 0.23      |
|                  | mean   | 0.18     | 0.01   | 0.01     | 0.23      |
|                  | stdev  | 0.08     | 0.01   | 0.01     | 0.02      |
| SS-IDVAE (1%)    | median | 0.24     | 0.07   | 0.06     | 0.32      |
|                  | mean   | 0.26     | 0.07   | 0.06     | 0.32      |
|                  | stdev  | 0.09     | 0.01   | 0.01     | 0.01      |
| SS-IDVAE (10%)   | median | 0.24     | 0.07   | 0.06     | 0.33      |
|                  | mean   | 0.27     | 0.07   | 0.06     | 0.33      |
|                  | stdev  | 0.07     | 0.01   | 0.01     | 0.02      |
| IDVAE            | median | 0.29     | 0.07   | 0.11     | 0.33      |
|                  | mean   | 0.30     | 0.07   | 0.12     | 0.33      |
|                  | stdev  | 0.07     | 0.01   | 0.04     | 0.02      |
| SS-IVAE (1%)     | median | 0.16     | 0.01   | 0.03     | 0.21      |
|                  | mean   | 0.19     | 0.02   | 0.03     | 0.17      |
|                  | stdev  | 0.09     | 0.01   | 0.01     | 0.08      |
| SS-IVAE (10%)    | median | 0.18     | 0.01   | 0.02     | 0.23      |
|                  | mean   | 0.21     | 0.01   | 0.02     | 0.22      |
|                  | stdev  | 0.10     | 0.01   | 0.01     | 0.11      |
| IVAE             | median | 0.12     | 0.03   | 0.02     | 0.21      |
|                  | mean   | 0.14     | 0.03   | 0.03     | 0.22      |
|                  | stdev  | 0.08     | 0.01   | 0.02     | 0.12      |
| SS-FULLVAE (1%)  | median | 0.08     | 0.01   | 0.01     | 0.25      |
|                  | mean   | 0.09     | 0.01   | 0.01     | 0.25      |
|                  | stdev  | 0.05     | 0.01   | 0.01     | 0.02      |
| SS-FULLVAE (10%) | median | 0.16     | 0.01   | 0.02     | 0.25      |
|                  | mean   | 0.16     | 0.01   | 0.02     | 0.25      |
|                  | stdev  | 0.09     | 0.01   | 0.01     | 0.02      |
| FULLVAE          | median | 0.30     | 0.01   | 0.02     | 0.21      |
|                  | mean   | 0.29     | 0.01   | 0.02     | 0.20      |
|                  | stdev  | 0.04     | 0.01   | 0.01     | 0.07      |

Table 7. MIG median, mean and standard deviation (stdev) for all the tested methods and datasets (the higher the better).

|                  |        | DSprites | CARS3D | SHAPES3D | SMALLNORB |
|------------------|--------|----------|--------|----------|-----------|
| $\beta$ -VAE     | median | 0.90     | 0.91   | 0.90     | 0.89      |
|                  | mean   | 0.89     | 0.90   | 0.91     | 0.88      |
|                  | stdev  | 0.06     | 0.07   | 0.03     | 0.03      |
| SS-IDVAE (1%)    | median | 0.95     | 0.95   | 0.96     | 0.97      |
|                  | mean   | 0.95     | 0.92   | 0.92     | 0.96      |
|                  | stdev  | 0.02     | 0.07   | 0.05     | 0.03      |
| SS-IDVAE (10%)   | median | 0.95     | 0.95   | 0.95     | 0.97      |
|                  | mean   | 0.95     | 0.94   | 0.93     | 0.96      |
|                  | stdev  | 0.03     | 0.05   | 0.04     | 0.03      |
| IDVAE            | median | 0.96     | 0.93   | 0.96     | 0.97      |
|                  | mean   | 0.95     | 0.91   | 0.95     | 0.96      |
|                  | stdev  | 0.03     | 0.07   | 0.03     | 0.03      |
| SS-IVAE (1%)     | median | 0.91     | 0.94   | 0.90     | 0.89      |
|                  | mean   | 0.90     | 0.92   | 0.89     | 0.89      |
|                  | stdev  | 0.06     | 0.07   | 0.05     | 0.05      |
| SS-IVAE (10%)    | median | 0.91     | 0.89   | 0.87     | 0.88      |
|                  | mean   | 0.91     | 0.87   | 0.87     | 0.88      |
|                  | stdev  | 0.03     | 0.06   | 0.04     | 0.07      |
| IVAE             | median | 0.90     | 0.90   | 0.90     | 0.92      |
|                  | mean   | 0.89     | 0.91   | 0.90     | 0.91      |
|                  | stdev  | 0.04     | 0.04   | 0.04     | 0.04      |
| SS-FULLVAE (1%)  | median | 0.88     | 0.84   | 0.92     | 0.90      |
|                  | mean   | 0.87     | 0.85   | 0.91     | 0.90      |
|                  | stdev  | 0.04     | 0.08   | 0.05     | 0.01      |
| SS-FULLVAE (10%) | median | 0.89     | 0.88   | 0.92     | 0.89      |
|                  | mean   | 0.88     | 0.87   | 0.92     | 0.89      |
|                  | stdev  | 0.03     | 0.08   | 0.04     | 0.03      |
| FULLVAE          | median | 0.92     | 0.89   | 0.93     | 0.90      |
|                  | mean   | 0.91     | 0.87   | 0.92     | 0.89      |
|                  | stdev  | 0.02     | 0.07   | 0.03     | 0.06      |

Table 8. Modularity median, mean and standard deviation (stdev) for all the tested methods and datasets (the higher the better).

|                  |        | DSprites | CARS3D | SHAPES3D | SMALLNORB |
|------------------|--------|----------|--------|----------|-----------|
| $\beta$ -VAE     | median | 0.77     | 0.67   | 0.66     | 0.70      |
|                  | mean   | 0.77     | 0.67   | 0.66     | 0.70      |
|                  | stdev  | 0.01     | 0.02   | 0.03     | 0.03      |
| SS-IDVAE (1%)    | median | 0.81     | 0.70   | 0.69     | 0.81      |
|                  | mean   | 0.82     | 0.70   | 0.68     | 0.81      |
|                  | stdev  | 0.02     | 0.01   | 0.03     | 0.04      |
| SS-IDVAE (10%)   | median | 0.83     | 0.73   | 0.69     | 0.80      |
|                  | mean   | 0.83     | 0.73   | 0.69     | 0.81      |
|                  | stdev  | 0.02     | 0.01   | 0.03     | 0.04      |
| IDVAE            | median | 0.84     | 0.78   | 0.82     | 0.81      |
|                  | mean   | 0.84     | 0.78   | 0.81     | 0.81      |
|                  | stdev  | 0.01     | 0.01   | 0.04     | 0.04      |
| SS-IVAE (1%)     | median | 0.81     | 0.69   | 0.68     | 0.74      |
|                  | mean   | 0.81     | 0.69   | 0.69     | 0.74      |
|                  | stdev  | 0.02     | 0.01   | 0.04     | 0.03      |
| SS-IVAE (10%)    | median | 0.82     | 0.68   | 0.69     | 0.77      |
|                  | mean   | 0.82     | 0.68   | 0.69     | 0.77      |
|                  | stdev  | 0.01     | 0.01   | 0.02     | 0.03      |
| IVAE             | median | 0.82     | 0.77   | 0.72     | 0.76      |
|                  | mean   | 0.83     | 0.77   | 0.72     | 0.74      |
|                  | stdev  | 0.01     | 0.02   | 0.02     | 0.06      |
| SS-FULLVAE (1%)  | median | 0.80     | 0.66   | 0.70     | 0.76      |
|                  | mean   | 0.80     | 0.66   | 0.70     | 0.76      |
|                  | stdev  | 0.01     | 0.02   | 0.01     | 0.01      |
| SS-FULLVAE (10%) | median | 0.80     | 0.67   | 0.70     | 0.76      |
|                  | mean   | 0.80     | 0.67   | 0.70     | 0.76      |
|                  | stdev  | 0.02     | 0.02   | 0.01     | 0.02      |
| FULLVAE          | median | 0.78     | 0.67   | 0.70     | 0.76      |
|                  | mean   | 0.78     | 0.67   | 0.70     | 0.76      |
|                  | stdev  | 0.01     | 0.02   | 0.01     | 0.02      |

Table 9. Explicitness median, mean and standard deviation (stdev) for all the tested methods and datasets (the higher the better).

|                  |        | DSprites | CARS3D | SHAPES3D | SMALLNORB |
|------------------|--------|----------|--------|----------|-----------|
| $\beta$ -VAE     | median | 0.42     | 0.01   | 0.02     | 0.05      |
|                  | mean   | 0.37     | 0.01   | 0.02     | 0.04      |
|                  | stdev  | 0.16     | 0.01   | 0.01     | 0.01      |
| SS-IDVAE (1%)    | median | 0.10     | 0.00   | 0.05     | 0.14      |
|                  | mean   | 0.23     | 0.00   | 0.05     | 0.13      |
|                  | stdev  | 0.19     | 0.00   | 0.00     | 0.02      |
| SS-IDVAE (10%)   | median | 0.41     | 0.01   | 0.07     | 0.15      |
|                  | mean   | 0.46     | 0.01   | 0.07     | 0.15      |
|                  | stdev  | 0.13     | 0.01   | 0.01     | 0.01      |
| IDVAE            | median | 0.50     | 0.11   | 0.20     | 0.15      |
|                  | mean   | 0.51     | 0.11   | 0.22     | 0.15      |
|                  | stdev  | 0.11     | 0.01   | 0.09     | 0.01      |
| SS-IVAE (1%)     | median | 0.27     | 0.00   | 0.00     | 0.05      |
|                  | mean   | 0.29     | 0.00   | 0.00     | 0.06      |
|                  | stdev  | 0.19     | 0.01   | 0.02     | 0.07      |
| SS-IVAE (10%)    | median | 0.39     | 0.00   | 0.02     | 0.15      |
|                  | mean   | 0.39     | 0.01   | 0.03     | 0.16      |
|                  | stdev  | 0.14     | 0.01   | 0.03     | 0.09      |
| IVAE             | median | 0.27     | 0.17   | 0.03     | 0.12      |
|                  | mean   | 0.28     | 0.19   | 0.05     | 0.12      |
|                  | stdev  | 0.14     | 0.10   | 0.04     | 0.08      |
| SS-FULLVAE (1%)  | median | 0.25     | 0.01   | 0.02     | 0.05      |
|                  | mean   | 0.26     | 0.01   | 0.02     | 0.05      |
|                  | stdev  | 0.11     | 0.01   | 0.01     | 0.02      |
| SS-FULLVAE (10%) | median | 0.39     | 0.01   | 0.02     | 0.05      |
|                  | mean   | 0.38     | 0.01   | 0.02     | 0.06      |
|                  | stdev  | 0.13     | 0.01   | 0.01     | 0.03      |
| FULLVAE          | median | 0.51     | 0.01   | 0.02     | 0.18      |
|                  | mean   | 0.50     | 0.01   | 0.03     | 0.20      |
|                  | stdev  | 0.06     | 0.01   | 0.01     | 0.11      |

Table 10. SAP score median, mean and standard deviation (stdev) for all the tested methods and datasets (the higher the better).

715 REFERENCES

- 716 T. Q. Chen, X. Li, R. B. Grosse, and D. K. Duvenaud. Isolating sources of disentanglement in variational autoencoders. In  
717 *Proc. of the 31st Int. Conf. on Neural Inf. Proc. Sys.*, NeurIPS, 2018.
- 718
- 719 I. Higgins, L. Matthey, A. Pal, C. Burgess, X. Glorot, M. M. Botvinick, S. Mohamed, and A. Lerchner. beta-vae: Learning  
720 basic visual concepts with a constrained variational framework. In *Proc. of the 5th Int. Conf. on Learn. Repr.*, ICLR, 2017.
- 721
- 722 I. Khemakhem, D. P. Kingma., R. P. Mont, and A. Hyvärinen. Variational autoencoders and nonlinear ica: A unifying  
723 framework. In *Proc. of the 23rd Int. Conf. on Artif. Intel. and Stat.*, AISTATS, 2020.
- 724
- 725 A. Kumar, P. Sattigeri, and A. Balakrishnan. Variational inference of disentangled latent concepts from unlabeled observa-  
726 tions. In *Proc. of the 6th Int. Conf. on Learn. Repr.*, ICLR, 2018.
- 727
- 728 F. Locatello, S. Bauer, M. Lucic, S. Gelly, B. Schölkopf, and O. Bachem. Challenging common assumptions in the  
729 unsupervised learning of disentangled representations. In *Proc. of the 36th Int. Conf. on Mach. Learn.*, ICML, 2019.
- 730
- 731 K. Ridgeway and M. C. Mozer. Learning deep disentangled embeddings with the f-statistic loss. In *Proc. of the 31st Int.*  
732 *Conf. on Neural Inf. Proc. Sys.*, NeurIPS, 2018.
- 733
- 734
- 735
- 736
- 737
- 738
- 739
- 740
- 741
- 742
- 743
- 744
- 745
- 746
- 747
- 748
- 749
- 750
- 751
- 752
- 753
- 754
- 755
- 756
- 757
- 758
- 759
- 760
- 761
- 762
- 763
- 764
- 765
- 766
- 767
- 768
- 769
